# Supplementary material
Source: PubMed Central journal article supplement (PMC3080782)

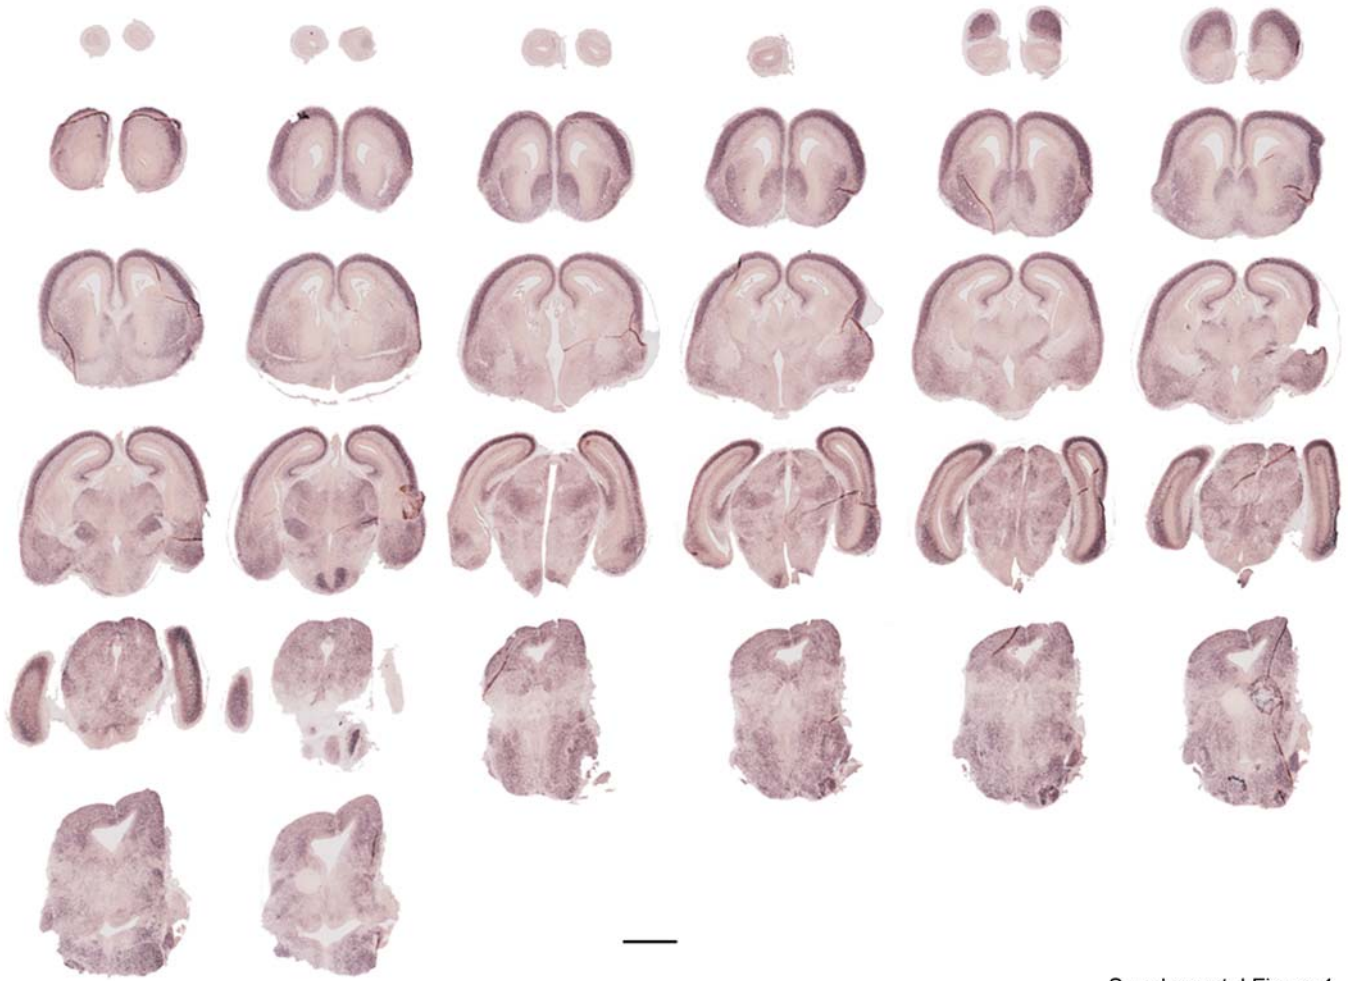

Supplemental Figure 1

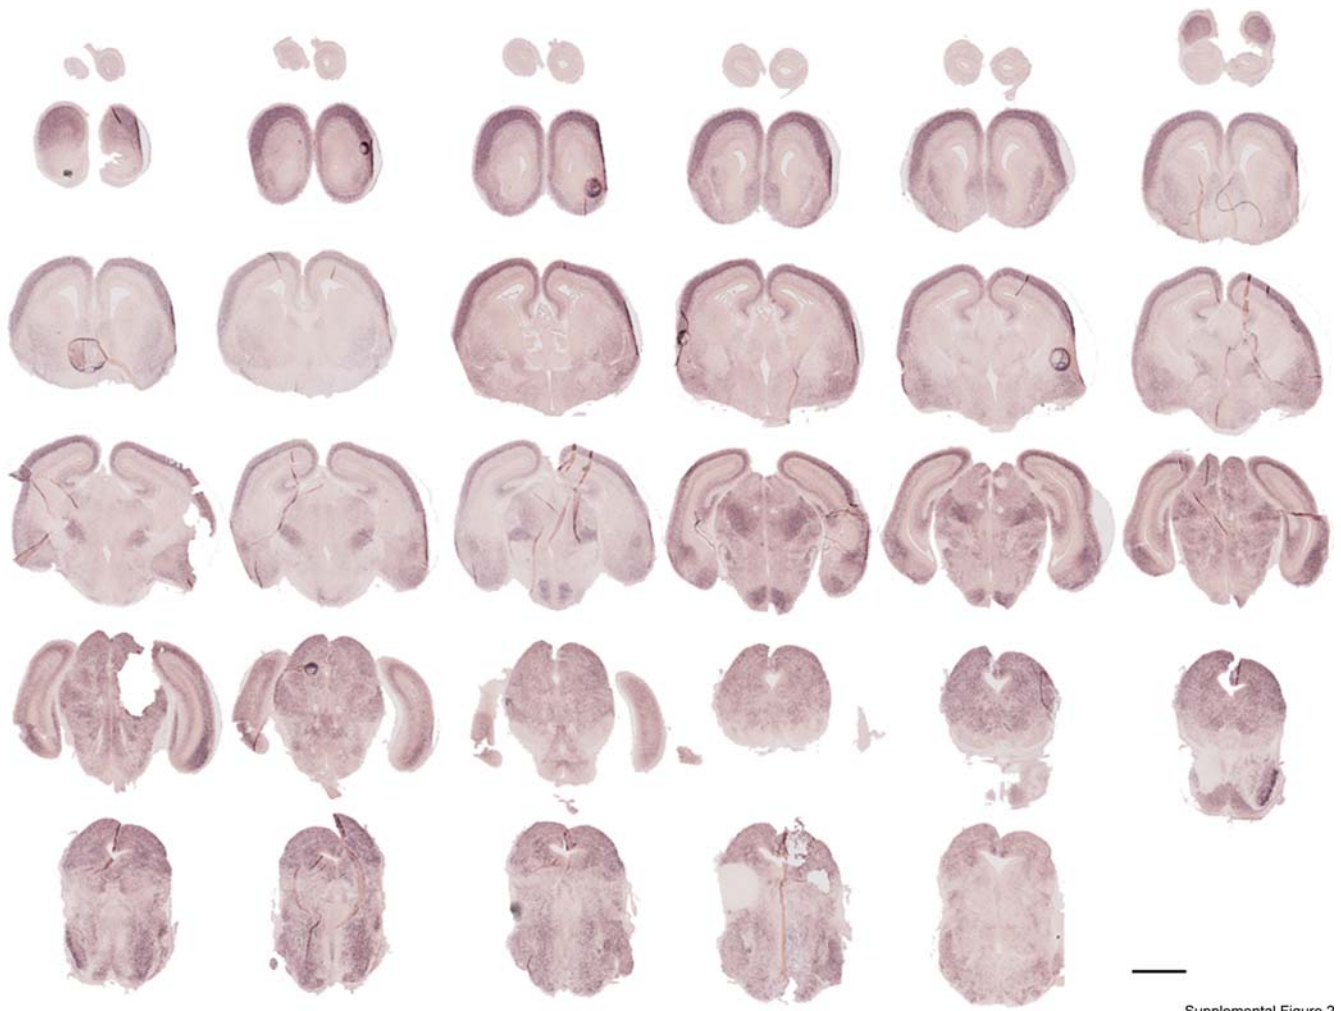

Supplemental Figure 2

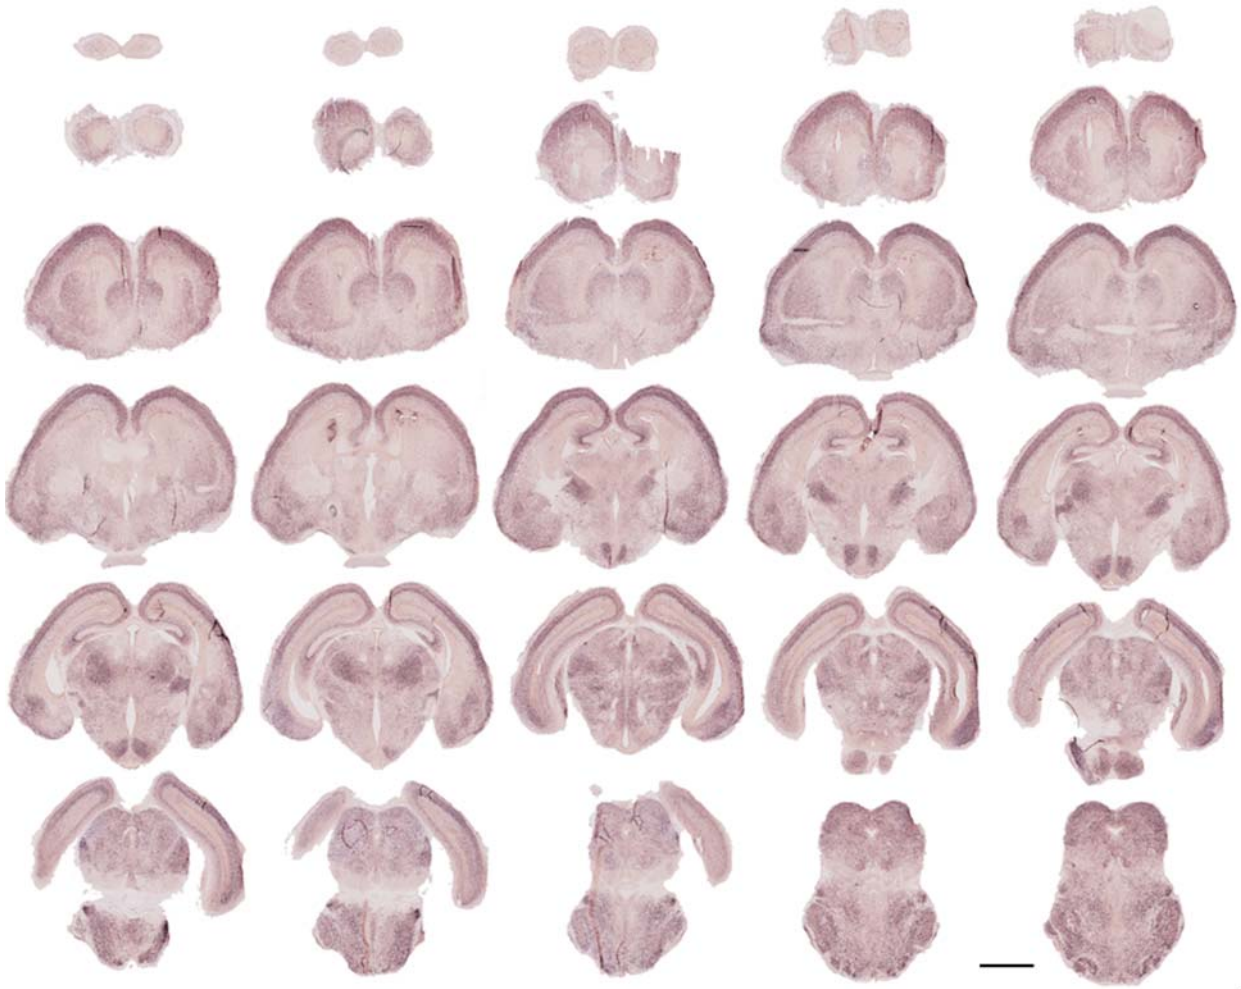

Supplemental Figure 3

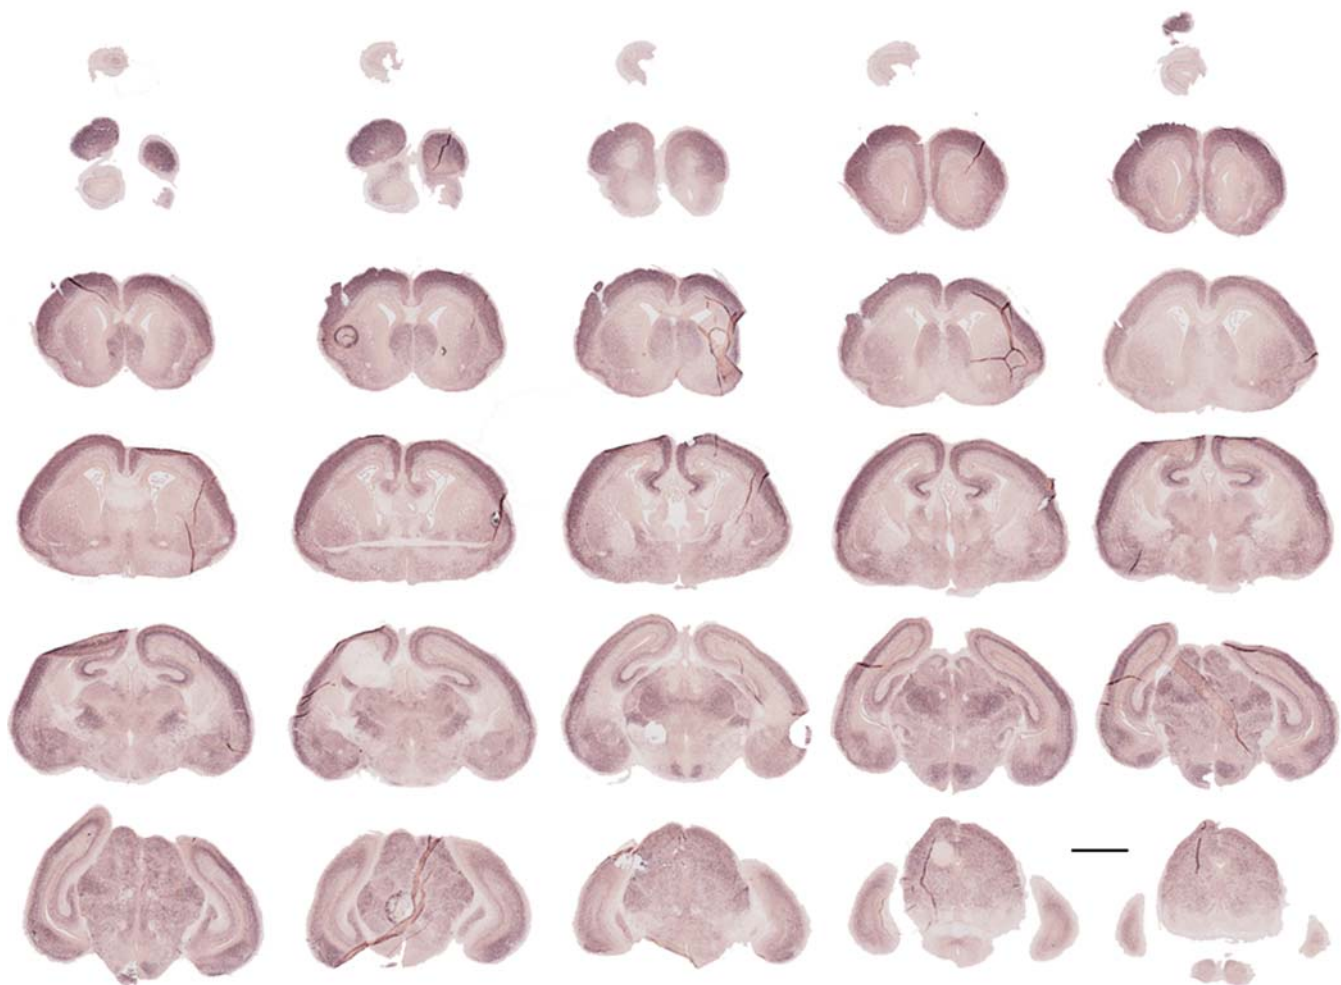

Supplemental Figure 4

Supplement: dne0033-0064-s01.pdf [file dne0033-0064-s01.pdf]
